# Supplementary material for: Andrographolide promotes hippocampal neurogenesis and spatial memory in the APPswe/PS1ΔE9 mouse model of Alzheimer’s disease
Source: PubMed Central journal article supplement (PMC8616902; doi:10.1038/s41598-021-01977-x), 2021-11-25
Supplement: 41598_2021_1977_MOESM1_ESM.pdf [file 41598_2021_1977_MOESM1_ESM.pdf]

**A**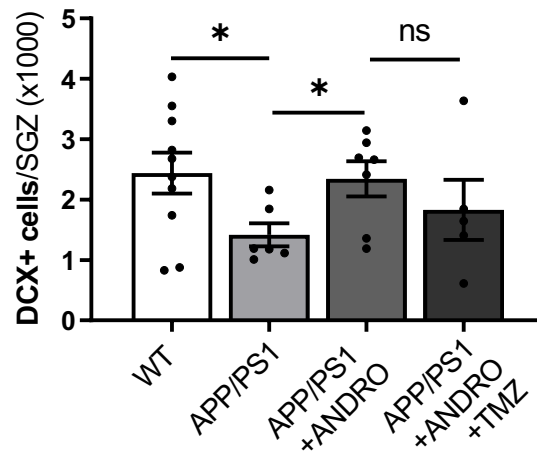**B**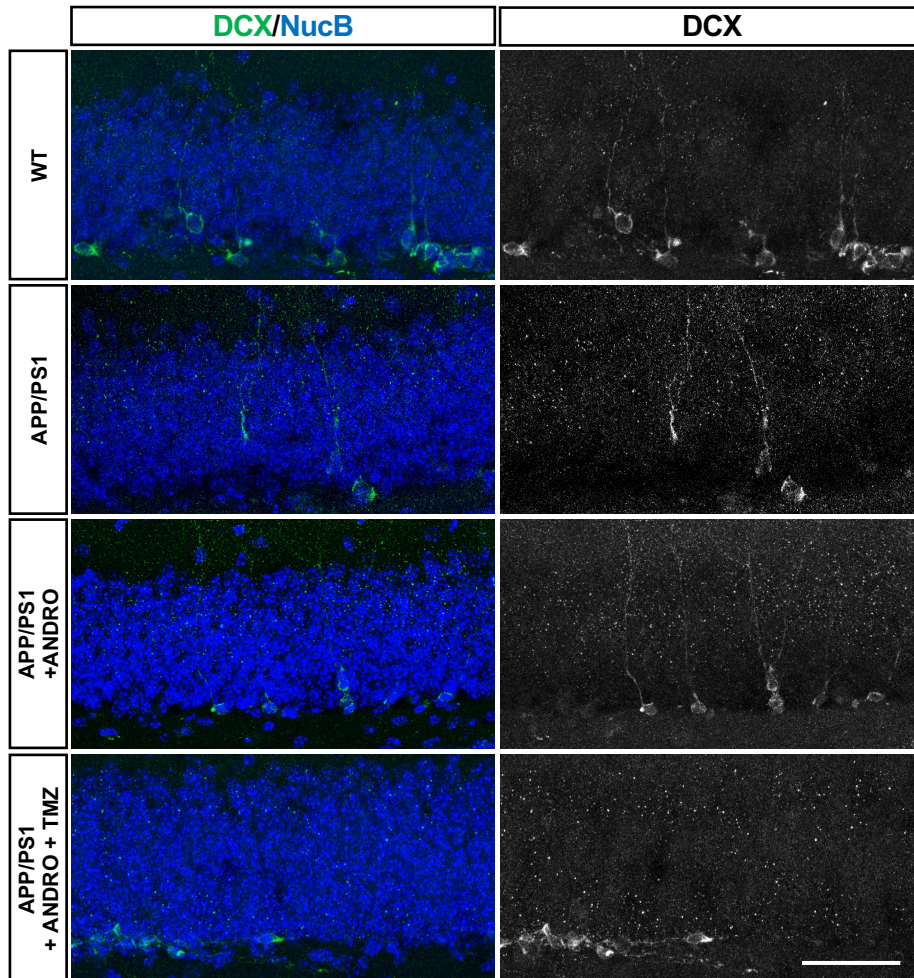

**Supplementary Figure S1. Analysis of DCX-positive cells in animals subjected to OLM task.** (A) Quantification of the total number of DCX+ cells in the granular cell layer (GCL) of all experimental groups subjected to OLM task. WT = 10 animals; APP/PS1 = 5 animals; APP/PS1+ANDRO = 7 animals; APP/PS1+ANDRO+TMZ = 5 animals. \* $p < 0.05$ . ns, non-significant (B) Representative immunostaining of DCX in all experimental groups. Scale Bar: 50  $\mu\text{m}$ .
